# Supplementary material for: Usefulness of miRNA-338-3p in the diagnosis of pemphigus and its correlation with disease severity
Source: PeerJ. 2018 Aug 3;6:e5388. doi: 10.7717/peerj.5388 (PMC6078064; doi:10.7717/peerj.5388)
Supplement: Supplemental Information 1 — Experimental and statistical results related to the article and the clinical data of the recruited patient. [file peerj-06-5388-s001.xlsx]

## Sheet: miRNA-338-3p level
	Number	Age	Gender（Female=0，Male=1）	Categories（0=control，1=Pemphigus，2=BP，3=Pemphigus-NA）	Initial=0，Relapse=1	2^(-△△Ct) Mean-1	2^(-△△Ct) Mean-2	2^(-△△Ct) Mean-3
	1	53	0	1	0	2.92817	0.618386	0.675175
	2	61	0	1	1	11.9277	3.33601
	3	69	1	1	1	4.12673	2.80094	1.30048
	4	67	1	1	1	3.27426	1.95332	1.08673
	5	71	1	1	1	10.8432	7.69335	3.43426
	6	75	1	1	0	8.93459	6.81661	6.17597
	7	65	0	1	1	7.50094	6.06542
	8	57	0	1	0	5.65032	2.74473	1.87688
	9	38	0	1	1	8.9797	6.26219	6.21893
	10	62	0	1	1	4.34694	1.10445
	11	67	0	1	0	14.1232	3.45017	1.09429
	12	38	1	1	0	0.392292	0.151075
	13	71	1	1	1	3.22657	1.60956	0.967053
	14	83	1	1	1	3.85928	0.523042	0.936272
	15	29	0	1	0	3.00008	1.54578	0.0865693
	16	62	1	1	1	3.2154	0.0960547	0.0865693
	17	59	1	1	0	0.526681	0.172939	0.122428
	18	64	0	1	1	5.00487	0.524858
	19	63	0	1	1	4.24275	0.91067
	20	49	1	1	0	4.24766	4.91321
	21	45	1	1	0	10.4107	9.53566
	22	44	0	1	0	8.69388	7.07796
	23	44	0	1	0	9.00047	6.3496	3.63847
	24	56	1	1		1.11729
	25	80	0	1		1.08423
	26	71	1	1		4.18918
	27	67	1	1		2.71321
	28	64	1	1		4.28709
	29	35	0	1		10.5317
	30	84	1	1		4.25748
	31	53	0	3		1.25266
	32	52	0	3		1.19748
	33	34	0	3		2.39219
	34	24	0	3		0.590496
	35	53	0	3		3.55537
	36	25	0	2		0.290511
	37	69	1	2		0.292532
	38	79	1	2		0.271684
	39	77	0	2		0.139339
	40	71	1	2		0.595979
	41	84	0	2		0.490843
	42	69	0	2		0.089209
	43	64	1	0		1.23542
	44	55	1	0		0.82932
	45	55	1	0		0.85165
	46	68	1	0		1.14472
	47	51	0	0		1.13945
	48	59	0	0		1.18099
	49	54	0	0		0.885768
	50	52	0	0		0.820742
	51	35	0	0		1.01162
	52	48	1	0		1.94531
	53	56	0	0		0.646176
	54	53	0	0		0.536506
	55	35	0	0		0.870551
	56	66	0	0		1.7211
	57	31	1	0		1.08925
	58	65	1	0		2.57874
	59	50	1	0		0.618423
	60	52	1	0		0.577009
	61	50	1	0		0.621288
	62	55	1	0		0.317905
	63	35	1	0		1.6245
	64	46	0	0		3.15287
	65	43	1	0		0.102238
	66	36	1	0		0.245989
	67	54	0	0		1.17283
	68	21	0	0		3.68926
	69	63	0	0		3.45017
	70	62	0	0		0.267016
	71	37	0	0		2.63902
	72	61	1	0		0.529732
	73	44	1	0		1.90088
	74	52	1	0		1.3566
	75	72	1	0		2.77022

## Sheet: DsgAb及评分
	Number	Dsg-1 (1st)	Dsg-1 (2nd)	Dsg-1 (3rd)	Dsg-3 (1st)	Dsg-3 (2nd)	Dsg-3 (3rd)	Disease activity-1st	Disease activity-2nd	Disease activity-3rd	Disease damage-1st	Disease damage-2nd	Disease damage-3rd	ABSIS-Skin (1st)	ABSIS-Skin (2nd)	ABSIS-Skin (3rd)	ABSIS-Mucosa (1st)	ABSIS-Mucosa (2nd)	ABSIS-Mucosa (3rd)	ABSIS-Subjiective feeling (1st)	ABSIS-Subjiective feeling (2nd)	ABSIS-Subjiective feeling (3rd)
	1	85.1	97.4	32.3	139.9	155	126.2	30.3	20.9	12	4	5	6	4.5	3.5	0.55	6	4	5	29	22	22
	2	166.3	161.1		9.1	8.5		14.3	4.3		7	8		4	1		0	0		15	15
	3	102.3	96.4	95.8	143.4	161.6	150.1	47	15	6	7	8	5	8.5	3.5	13	6	1	3	29.5	15	12
	4	175.8	196.4	211.8	171.3	172.7	186.5	41.3	32	24.5	9	8	9	18	10	3	5	3	3	43.5	27	18
	5	173.8	207.7	158.5	0.64	0.44	0.78	35.6	30.6	18	9	9	9	1	1	0	11	8	3.25	37	31.5	25
	6	141.8	101.6	64.9	178.5	178.1	159.1	59.9	33	18	7	6	4	2.75	0.85	0.45	8	8	6	44.5	36	28.5
	7	193.7	187.5		3.3	0.81		20	11.9		6	6		10.5	4.5		0	0		12	12
	8	7.7	6.4	1.8	40.7	32.2	16.5	23.5	12	9.6	4	5	2	4.5	1.5	0.45	1	0	0	7.5	3	0
	9	160.3	172.8	181.7	164.1	169.9	164.6	63.2	46.4	20.5	9	12	12	36.75	28	24	5	2	1	42	32.5	25
	10	171.5	151.3		202.1	97.7		29	18		8	9		21.5	13.75		1	1		14	14
	11	159.9	148.49	164.76	138.5	68.5	183.66	66	50.6	40	2	7	10	94.5	38.55	26.5	4	3	3	22	26	22
	12	22.6	11.5	5.4	124.7	128.9	106.8	48	37		0	1		2	0		1	7		43.5	38.5
	13	133.7	142.6	133.89	114.5	113.6	41.59	36.8	19.3	7.3	10	10	4	10.5	8	1.5	0	0	0	11	11	4.5
	14	153.1	146.9	137.3	128.3	116.2	105.8	57.5	45.4	26.9	1	4	9	39	27.15	24	4	2	2	36	25	19.5
	15	156.7	142	156.94	127.7	136.9	128.64	40	22.3	21.9	3	5	7	40.5	19	17	0	0	0	0	0	0
	16	148.7	148.7	27.06	116.1	17.47	1.06	65.9	31.2	22.6	9	10	11	35.75	25.5	12	5	3	2	39	34.5	27
	17	183.1	183.9	153.35	173.8	168.1	175.81	81.3	61	46	5	8	10	25.25	19.5	18.5	9	8	5	43.75	40	31.5
	18	132.4	138.05		145.5	110.6		45.6	23		7	9		30.75	8		7	3		34.5	15
	19	185.2	150.6		168.9	123.62		94.2	55.5		12	12		62	48.75		7	5		42	27.5
	20	164.1	152.3	152.71	144.8	138.7	163.93	47.5	24.6	18.6	2	8	9	24.5	7.5	4.75	3	1	1	11.5	8.5	8.5
	21	172.4	89.22	124.6	166.6	79.77	77.1	97	33.8		0	9		91.5	41.25		9	7		40	34.5
	22	104.2	138.83		10.4	121.99		14.3	6		2	4		7.5	3.5		0	0		0	0
	23	71.8	90.1	69.3	115.5	38.1	84.1	83	65.2	34.9	0	3	6	39	26	16.5	9	9	7	38.5	37	35

## Sheet: 临床数据
	Number	ALT	AST	ALB	CR	BUN	UA	Proteinuria	Hematuria	CK-MB	CK	HBDH	LDH	ESR	CRP	K+	Na+	Ca2+	WBC	NEU	ESO	Hb	PLT	ALT	AST	ALB	CR	BUN	UA	Proteinuria	Hematuria	CK-MB	CK	HBDH	LDH	ESR	CRP	K+	Na+	Ca2+	WBC	NEU	ESO	Hb	PLT	ALT	AST	ALB	CR
	1	35	44	42.8	70	4.9	264	0	0	14	236	161	199		2.02	3.75	140	2.25	6.62	2.46	0.5	124	262	20	17	37.4	60	7	183	0	0	11	63	130	172			4.09	140	2.27	13.66	7.62	0.04	127	336	23	21	36.3	54
	2	8	10	36.6	64	4.4	213	0	0						0.17	3.28	148	2.17	7.83	5.17	0.06	122	204
	3	13	22	30.7	142	7.6	330	0	0	9	73	113	168	27		3.77	143	2.2	7.85	4.06	0.67	115	245																							11	10	33.3	144
	4	9	9	32.8	80	5.7	294	0	0	7	26	100	124	12	12.14	4.63	140	2.29	9.24	7.01	0.01	118	441														16.91	4	141	2.36	12.69	9.35	0.09	124	379	21	12	35.6	88
	5	14	12	33.2	62	5.6	223	0	0	11	41	112	137		0.52	3.89	141	2.12	11.85	10.13	0	119	195																		15.14	10.52	0.05	131	224	14	13	38.4	82
	6	12	14	30.7	103	4.4	350	0	0	7	15	154	168		25.84	4.48	137	2.48	8.29	6.18	0	147	340	100	35	29.8	76	8.8	118								0.79	4.02	138	2.24	23.21	19.17	0	139	164
	7	16	18	39.8	68	5.4	312	0	0	20	58	184	237	6	6.97	3.85	143	2.31	7.28	4.54	0.3	134	105							0	0						0.63	4.48	139	2.29	12.29	8.41	0.1	149	310
	8	28	15	37.1	54	9.7	206	0	0.5	13	42	160	508		0.23	4.27	136	2.3	11.09	9.93	0	124	165																		9.68	7.2	0.13	125	173	16	13	35.2	62
	9	14	12	37	60	4.2	303	0	1	11	53	146	209		5.66	3.26	140	2.2	13.78	9.88	0.21	126	320	20	13	33.5	55	3.5	342								1.22	3.45	141	2.15	15.51	12.86	0.03	127	221	18	16	38	61
	10	16	16	35.1	55	2.5	469	0	0	7	26	192	243		5.71	3.07	143	2.09	7.57	6.36	0.02	121	200	25	22	42.5	57	4.4	237	0	0	11	18	186	229		5.17	3.78	142	2.16	9.42	7.7	0.03	137	221
	11	18	12	33.8	52	4.7	277	0	0	11	78	119	140	7	6.23	3.78	143	2.16	7.76	5.54	0.39	129	278	32	14	35	54	5.7	194			14	24	147	173	5	3.05	4.02	143		8.72	6.1	0.06	125	255	38	12	33.7	61
	12	15	9	31.3	121	9.3	299	0	0	37	16	92	121	25	18.22	3.7	142	2.18	7.49	5.47	0.09	111	267	24	13	27	105	6.9	387								41.97	4.01	137		9.74	7.85	0.07	117	223	127	43	25.5	94
	13	14	15	35.4	90	10.3	432	0	2	13	67	142	179		0.38	4.51	142	2.21	6.96	5.37	0	138	176
	14	17	19	31.2	84	8.4	281	0	0.5	7	46	95	112		53.05	3.78	140	2.21	6.88	4.11	0.34	102	253	34	21	29.5	82	9.6	389	0	0					10	1.7	3.82	140	2.14	9.74	6.5	0.05	101	254	23	11	28.9	76
	15	16	11	40.3	53	2.9	298	0	0	16	49	144	181		15.35	3.92	139	2.28	9.76	8.39	0	133	392	27	21	34.4	57	6.2	265			37	67	236	283		0.14	4.34	138	2.13	11.38	8.42	0	134	103	37	16	36.3	52
	16	52	44	27.6	52	5.3	263	0	0	24	108	168	204		45.23	3.8	139	2.14	8.82	7.66	0.02	151	284	33	26	34.7	48	5.7	234								6.21	4.3	142		9.67	8.55	0.01	145	284	/	/	/	62
	17	18	9	32.2	57	6	363	0	1	7	38	116	144		17.98	4.26	140	2.24	6.53	5.27	0.2	129	204	23	12	32.3	59	8.3	250									4.27	139	2.18	9.22	7.14	0.03	131	225	22	8	29.9	46
	18	28	19	31.8	59	4.8	271	0	0	17	47	123	157		0.88	3.94	143	2.15	12.53	11.24	0	115	296	49	24	31.6	54	5.5	319	0	0						0.49	4.36	142		10.63	8.15	0.03	132	278
	19	6	7	27.2	48	3.3	313	0	0	5	19	93	119	41	52.53	3.78	138	2.03	9.56	7.91	0	96	344	9	12	33	47	2.9	395	0	0						2.93	3.81	141	2.08	7.19	4.89	0.02	105	221
	20	91	28	34.6	67	6.8	506	0	0	10	20	276	320		0.91	4.09	142	2.12	10.31	8.7	0	123	164	67	14	31.6	59	4.1	464			13	16	278	319		0.44	3.92	144	2.14	11.59	9.54	0	122	175	43	16	37	75
	21	214	79	13.9	57	6.4	155	1	0.5	15	145	154	159	84	115.05	3.89	136	1.81	9.02	7.51	0	91	326	45	17	31	57	6.4	220			19	58	103	127		2.83	3.81	140	2.02	8.63	5.55	0.06	87	375	11	6	33	57
	22	20	15	38.3	62	5.4	378	0	0	10	47	118	157		3.71				9.95	6.52	0.39	106	306	15	14	37.1	50	3.6	185								0.41	3.79	140	2.22	16.94	11.45	0.08	109	279
	23	9	13	39.1	/	/	/	0	2	11	55	118	140		13.55	3.49	141	2.26	9.29	5.37	0.76	120	350	13	13	32.4	68	3.2	231			9	87	107	129			3.71	142		10.59	7.3	0.08	101	298	15	62	35.6	173
[truncated: 18 more columns]

## Sheet: RNF114 level
Name	Gene	Cт	Ct Mean	Ct SD	Gene	Ct	Ct Mean	Ct SD	△Ct Mean	△△Ct Mean	2^(-△△Ct) Mean
1st
Patient 1	RNF114	23.76	23.6867	0.0899383	GAPDH	20.96	21.2133	0.212498	2.47333	-1.03667	2.05148
		23.56				21.2
		23.74				21.48
Patient 2	RNF114		23.92	0.27	GAPDH		21.465	0.305	2.455	-1.055	2.07772
		24.19				21.16
		23.65				21.77
Patient 3	RNF114	25.48	25.24	0.311555	GAPDH	21.6	21.8567	0.182635	3.38333	-0.126667	1.09177
		24.8				22.01
		25.44				21.96
Patient 4	RNF114	23.5	23.9633	0.411528	GAPDH	19.65	19.8367	0.138163	4.12667	0.616667	0.652176
		23.89				19.98
		24.5				19.88
Patient 5	RNF114	23.49	23.6367	0.405408	GAPDH	21.58	21.35	0.227596	2.28667	-1.22333	2.33486
		24.19				21.43
		23.23				21.04
Patient 6	RNF114	24.84	24.7033	0.114407	GAPDH	20.91	20.9067	0.142906	3.79667	0.286667	0.819794
		24.56				20.73
		24.71				21.08
Control 1	RNF114	24.07	24.45	0.38	GAPDH		20.915	0.095	3.535	0.025	0.982821
						20.82
		24.83				21.01
Control 2	RNF114	22.58	22.81	0.23	GAPDH	18.59	19.0333	0.316684	3.77667	0.266667	0.831238
		23.04				19.2
						19.31
Control 3	RNF114		22.385	0.435	GAPDH	19.13	19.2667	0.664346	3.11833	-0.391667	1.31191
		21.95				18.53
		22.82				20.14
Control 4	RNF114	21.56	21.62	0.06	GAPDH	18.23	18.5533	0.288251	3.06667	-0.443333	1.35974
		21.68				18.5
						18.93
Control 5	RNF114		26.105	0.275	GAPDH	20.78	20.85	0.07	5.255	1.745	0.298334
		25.83				20.92
		26.38
Control 6	RNF114	23.53	23.685	0.155	GAPDH	21.72	21.52	0.141657	2.165	-1.345	2.5403
		23.84				21.43
						21.41
Control 7	RNF114	24.87	23.8133	0.755263	GAPDH	20.77	20.8567	0.228813	2.95667	-0.553333	1.46747
		23.42				20.63
		23.15				21.17
Control 8	RNF114		24.475	0.475	GAPDH	20.16	20.34	0.18	4.135	0.625	0.64842
		24
		24.95				20.52
Control 9	RNF114		23.725	0.195	GAPDH		19.65	0.16	4.075	0.565	0.675955
		23.92				19.49
		23.53				19.81
Control 10	RNF114	23.59	23.36	0.23	GAPDH	19.92	20.3433	0.30401	3.01667	-0.493333	1.40769
						20.62
		23.13				20.49
2nd
Patient 7	RNF114	22.3	22.2233	0.0654896	GAPDH	19.58	19.5867	0.0249444	2.63667	-2.02333	4.06522
		22.23				19.56
		22.14				19.62
Patient 8	RNF114	24.08	23.7	0.38	GAPDH		22.16	0.3	1.54	-3.12	8.69388
		23.32				22.46
						21.86
Patient 9	RNF114	24.49	24.45	0.157692	GAPDH		22.915	0.185	1.535	-3.125	8.72406
		24.24				22.73
		24.62				23.1
Patient 10	RNF114	21.53	21.43	0.127541	GAPDH	19.12	19.09	0.0355903	2.34	-2.32	4.99332
		21.25				19.04
		21.51				19.11
Patient 11	RNF114	22.72	22.6733	0.0410961	GAPDH	19.66	19.6733	0.0498888	3	-1.66	3.16017
		22.62				19.74
		22.68				19.62
Patient 12	RNF114	24.05	24.2733	0.373839	GAPDH	19.61	19.53	0.0653197	4.74333	0.0833333	0.943874
		24.8				19.53
		23.97				19.45
Patient 13	RNF114	23.86	24.5733	0.5838	GAPDH		20.11	0.61	4.46333	-0.196667	1.14605
		24.57				19.5
		25.29				20.72
Control 11	RNF114	23.06	23.15	0.0734847	GAPDH	17.04	17.36	0.32	5.79	1.13	0.456916
		23.15				17.68
		23.24
Control 12	RNF114		24.035	0.265	GAPDH	20.44	20.31	0.176824	3.725	-0.935	1.91189
		24.3				20.43
		23.77				20.06
Control 13	RNF114	24.02	24.4833	0.383869	GAPDH	19.26	19.2067	0.434383	5.27667	0.616667	0.652176
		24.96				19.71
		24.47				18.65
Control 14	RNF114	24.55	24.565	0.015	GAPDH	20.55	20.185	0.365	4.38	-0.28	1.21419
						19.82
		24.58
Control 15	RNF114		23.455	0.205	GAPDH	19.26	19.12	0.14	4.335	-0.325	1.25266
		23.25				18.98
		23.66
Control 16	RNF114	25.04	24.7467	0.359753	GAPDH	19.25	19.66	0.41	5.08667	0.426667	0.743979
		24.24				20.07
		24.96
Control 17	RNF114	24.08	24.6133	0.391777	GAPDH		19.115	0.125	5.49833	0.838333	0.559289
		25.01				18.99
		24.75				19.24
Control 18	RNF114	25.98	25.2233	0.571217	GAPDH	21.81	21.23	0.58	3.99333	-0.666667	1.5874
		25.09
		24.6				20.65
Control 19	RNF114	21.84	22.78	0.94	GAPDH		18.92	0.68	3.86	-0.8	1.7411
		23.72				18.24
						19.6
3rd
Patient 14	RNF114	25.15	25.2767	0.110855	GAPDH	20.71	20.7733	0.046428	4.50333	0.233333	0.850667
		25.42				20.79
		25.26				20.82
Patient 15	RNF114	24.84	24.8	0.0565685	GAPDH	19.95	19.4433	0.364173	5.35667	1.08667	0.470848
		24.72				19.11
		24.84				19.27
Patient 16	RNF114	23.99	23.355	0.635	GAPDH	18.82	18.745	0.075	4.61	0.34	0.790041
						18.67
		22.72
Patient 17	RNF114	24.63	24.5667	0.569229	GAPDH	20.74	20.3	0.319687	4.26667	-0.00333333	1.00231
		23.84				19.99
		25.23				20.17
Patient 18	RNF114	24.63	24.4367	0.46942	GAPDH	20.8	20.895	0.095	3.54167	-0.728333	1.65672
		24.89				20.99
		23.79
Control 20	RNF114		24.99	0.84	GAPDH	20.5	20.59	0.09	4.4	0.13	0.913831
		24.15				20.68
		25.83
Control 21	RNF114	25.71	26.0567	0.285813	GAPDH	20.67	20.1267	0.409905	5.93	1.66	0.316439
		26.05				19.68
		26.41				20.03
Control 22	RNF114	25.74	25.6733	0.0478423	GAPDH	21.73	21.7067	0.0329983	3.96667	-0.303333	1.23399
		25.63				21.66
		25.65				21.73
Control 23	RNF114	24.28	23.995	0.285	GAPDH		20.595	0.105	3.4	-0.87	1.82766
						20.7
		23.71				20.49
Control 24	RNF114	24.92	24.8567	0.269114	GAPDH	19.63	19.8233	0.500755	5.03333	0.763333	0.589134
		24.5				20.51
		25.15				19.33
Control 25	RNF114	26.02	25.6433	0.267872	GAPDH	21.76	21.495	0.265	4.14833	-0.121667	1.08799
		25.49				21.23
		25.42
Control 26	RNF114	25.62	25.75	0.13	GAPDH	22.48	21.97	0.394208	3.78	-0.49	1.40444
		25.88				21.52
						21.91
Control 27	RNF114	24.83	24.905	0.075	GAPDH	20.07	20.22	0.285774	4.685	0.415	0.750019
						19.97
		24.98				20.62
Control 28	RNF114	23.53	24.1633	0.540206	GAPDH	20.82	21.065	0.245	3.09833	-1.17167	2.25272
		24.11				21.31
		24.85
